# Supplementary material
Source: MDPI journal article supplement (https://www.mdpi.com/2073-4395/11/11/2347)
Supplement: s1 [file s1]

# Cytogenetical Analysis of Oat Seedling Root Meristem Treated with Permafrost-Derived *Bacillus* spp.

Olga V. Domanskaya <sup>1</sup>, Nina A. Bome <sup>2</sup>, Aleksandr V. Iashnikov <sup>1</sup>, Anastasia V. Vasilchenko <sup>1,3</sup> and Alexey S. Vasilchenko <sup>1,\*</sup>

<sup>1</sup> Laboratory of antimicrobial resistance, Institute of Environmental and Agricultural Biology (X-BIO), Tyumen State University, Tyumen, Russian Federation

<sup>2</sup> Biology Institute, Tyumen State University, Russian Federation

<sup>3</sup> All-Russian Institute of Plant Protection, St. Petersburg-Pushkin, Russian Federation

\* Correspondence: avasilchenko@gmail.com

## Material and Methods

The studied bacterial strains were cultivated at 5 °C and 25 °C in LB medium. Barley seeds (n = 30) were soaked in a bacterial suspension for 2 h, then they were placed in sterile Petri dishes (10 seeds per dish) on the surface of a wet filter paper in a checkerboard pattern with embryos in one direction. Petri dishes were incubated at 20 ± 2 °C for 3 days. The control seeds were soaked in distilled water. The root tips were fixed in Carnoy solution [(ethanol (99%): glacial acetic acid (3:1)] for 24 h and stained with acetocarmine dye [1]. Plant cells were microscopically evaluated, and the mitotic index, phase indices (I) of dividing cells were scored [2]. The mitotic index (%), was calculated according to formula (1)

$$MI = (\text{Number of dividing cells} / \text{Total number of cells}) \times 100 \quad (1)$$

Data were expressed as mean ± SD. Differences between control group and treatment groups were determined using Student's t-test. P-values of less than 0.05 were considered statistically significant.

## Results

The cytotoxic effect of permafrost-derived *Bacillus* spp. was assessed by the mitotic activity of root meristems of seedlings *Avena sativa* L after the treatment with bacterial suspensions. Genotoxicity was assessed by determining the mitotic index.

**Table S1.** Mitotic index of oat seedling root meristem cells under the treatment *Bacillus* spp.

| Strains                     | 5 °C |     |                         | 22 °C |      |                         |
|-----------------------------|------|-----|-------------------------|-------|------|-------------------------|
|                             | N    | n   | Mitotic index MI<br>± m | N     | n    | Mitotic index MI<br>± m |
| <i>B. megaterium</i> 312    | 1411 | 241 | 17,08 ± 0,56            | 815   | 166  | 20,36 ± 0,76            |
| <i>B. megaterium</i> 629    | 3596 | 842 | 23,41 ± 0,44            | 3377  | 852  | 25,22 ± 0,45*           |
| <i>B. cereus</i> 1257       | 2013 | 464 | 23,05 ± 0,59            | 3281  | 765  | 23,31 ± 0,49*           |
| <i>B. cereus</i> 630        | 2169 | 572 | 26,36 ± 0,77*           | 3854  | 1033 | 26,80 ± 0,39*           |
| <i>B. cereus</i> 875        | 2582 | 681 | 26,37 ± 0,43*           | 1256  | 264  | 21,01 ± 0,56            |
| <i>B. subtilis</i> 948P     | 3134 | 820 | 26,16 ± 0,89*           | 3042  | 681  | 22,38 ± 0,39*           |
| <i>B. simplex</i> 948P1     | 3201 | 830 | 25,93 ± 0,72*           | 3084  | 597  | 19,36 ± 0,42            |
| <i>Bacillus</i> sp. B-10130 | 2452 | 159 | 6,49 ± 0,33*            | 2473  | 317  | 12,82 ± 0,51*           |
| Control group               | 3454 | 351 | 10,16 ± 0,89            | 3454  | 351  | 10,16 ± 0,89            |

Note: N is the total number of scored cells; n is the number of investigated phases; MI ± m - mitotic index. \* differences with control are significant at P < 0.05.

In general, the treatment of oat seeds with bacterial suspensions does not lead to suppression of cell's division (Table S1). With the exception of one strain (*Bacillus* sp. B-10130), treatment with permafrost-derived *Bacillus* spp. leads to an intensification of cells division. Calculated MI was increased by two times comparing to water-treated control group (Table S1). Thus, a reliably positive effect on the mitotic activity of the cells of oat seedling roots was revealed during seed treatment with permafrost-derived *Bacillus* strains.

## References

1. Ivanova, E., et al. "Somatostatic Effect of Heavy Metal Contaminated Waters In The Region of The Town Of Panagjurishte, Bulgaria." *Journal of Environmental Protection* 4.2 (2003): 284-287.
2. Oney-Birol, S. Exogenous L-Carnitine Promotes Plant Growth and Cell Division by Mitigating Genotoxic Damage of Salt Stress. *Sci Rep* 9, 17229 (2019). <https://doi.org/10.1038/s41598-019-53542-2>.
